# Supplementary material for: Insights from the Construction of Adenovirus-Based Vaccine Candidates against SARS-CoV-2: Expecting the Unexpected
Source: MDPI journal article supplement (doi:10.3390/v15112155), 2023-10-25
Supplement: s1 [file s1]

### Supplementary Material

**Table S1. Tabular Listing of all used Primers and Oligonucleotides for Homologous Recombination.** Homology arms are underlined, melting temperature annotated as  $T_M$ .

| Incorporation                                      | Direction | Homolgy | Sequence [5' → 3']                                                                                                           | $T_M$ [°C] |
|----------------------------------------------------|-----------|---------|------------------------------------------------------------------------------------------------------------------------------|------------|
| codon-opt $S_{full}/S_1$                           | Forward   | Bacmid  | <u>AAATCAAAGAACTGCTCCTCAGTGGATGTTGCCCTTACTTCTAGGCCTGTGCCAC</u><br>CATGTCGTCTTCTCTGGTC                                        | 80.5       |
| codon-opt $S_{full}$                               | Reverse   | Bacmid  | <u>GCGGTTGGAATAATAGCGAGAACAGAGAAATAGCGGCAAAAATAATACCCTTA</u><br>GGTGTAATGCAGCTTCACGCC                                        | 78.8       |
| codon-opt $S_1$                                    | Reverse   | Bacmid  | <u>GCGGTTGGAATAATAGCGAGAACAGAGAAATAGCGGCAAAAATAATACCCTTA</u><br>CCGGGCTCTTCTGGGAGAGT                                         | 79.5       |
| C-StrepII $S_1$ opt                                | Forward   | Bacmid  | <u>GCAACTCCTGTCTTGCATTGCACTAAGTCTTGCACTTGTCACGAATTCGCAGTGCG</u><br>TCAATCTGACAACCTCGG                                        | 80.6       |
| C-StrepII $S_1$ opt                                | Reverse   | Bacmid  | <u>GAAATAGCGGCAAAAATAATACCCTTACTTCTCGAACTGGGGGTGGCTCCACCG</u><br>GGCTCTTCTGGGAGAGT                                           | 81.5       |
| rpsL-neo for $\Delta SV40$                         | Forward   | Bacmid  | <u>GTACGGTGGGAGGTCTATATAAGCAGAGCTGGTTTACTGTAACCGTCAGATCGGC</u><br>CTGGTGATGATGGCGGGATCG                                      | 83.0       |
| rpsL-neo for $\Delta SV40$                         | Reverse   | Bacmid  | <u>GCACTGTGAGGAGACCAGGCAGCAGGACCAGGAAGACGAACATGGTGGCTC</u><br>AGAAGAAGCTCGTCAAGAAGGCG                                        | 84.1       |
| $\Delta SV40$                                      | Reverse   | Bacmid  | <u>GCACTGTGAGGAGACCAGGCAGCAGGACCAGGAAGACGAACATGGTGGCAC</u><br>CGGTGGATCCCGGGCCCCG                                            | 87.3       |
| rpsL-neo for $\Delta SP$ &<br>IL-2- $S_{full}/S_1$ | Forward   | Bacmid  | <u>GAACTGCTCCTCAGTGGATGTTGCCCTTACTTCTAGGCCTGTGCCACCATGGCCTG</u><br>GTGATGATGGCGGGATCG                                        | 83.8       |
| rpsL-neo for $\Delta SP$<br>&IL-2- $S_{full}/S_1$  | Reverse   | Bacmid  | <u>CTATTAGTATAAGCAGGTGGCAGCTGAGTCCGAGTTGTGACATTGACGCACCTGTC</u><br>AGAAGAAGCTCGTCAAGAAGGCG                                   | 81.1       |
| IL-2- $S_{full}/S_1$                               | Oligo     | Bacmid  | <u>GAACTGCTCCTCAGTGGATGTTGCCCTTACTTCTAGGCCTGTGCCACCATGTACAG</u><br>ATGCAACTCCTGTCTTGCATTGCACTAAGTCTTGCACTTGTCACGAATTCGCAGTGC | 85.4       |
| $\Delta SP$ - $S_{full}/S_1$                       | Oligo     | Bacmid  | <u>GAACTGCTCCTCAGTGGATGTTGCCCTTACTTCTAGGCCTGTGCCACCATGTGAGTGC</u><br>CGTCAATCTGACAACCTCGGACTCAGCTGCCACCTGCTTATACTAATAG       | 83.9       |
| $\Delta SV40$ - $S_\beta/S_\gamma$                 | Forward   | Bacmid  | <u>CGAATTCTGCAGTCGACGGTACCGCGGGCCCGGGATCCACCGGTGCCACCATGT</u><br>TCGTCTTCTCTGGTC                                             | 86.3       |
| $\Delta SV40$ - $S_\beta/S_\gamma$                 | Reverse   | Bacmid  | <u>CGGTTGGAATAATAGCGAGAACAGAGAAATAGCGGCAAAAATAATACCCTTAG</u><br>GAGCCACAGCTACAGC                                             | 78.3       |

**Table S2. Tabular Listing of Primers used for mRNA Splicing Analysis by PCR.** Melting temperature annotated as  $T_M$ .

| Primer             | Orientation | Sequence                    | $T_M$ [°C] |
|--------------------|-------------|-----------------------------|------------|
| #1 5'UTR           | Forward     | GAGACGCCATCCACGCTGT         | 61         |
| #2 Linker fwd      | Forward     | GCAGTCGACGGTACCGCG          | 62.8       |
| #3 WT $S_1$ 1 fwd  | Forward     | GGGACCAATGGTACTAAGAGG       | 59.8       |
| #4 WT $S_1$ 2 fwd  | Forward     | GATCTCTGCTTTACTAATGTCTATGCA | 60.4       |
| #5 WT $S_2$ fwd    | Forward     | GTTGAGGCTGAAGTGCAAATTG      | 58.4       |
| #6 opt $S_1$ 1 fwd | Forward     | CGGCACCAATGGCACAAAGC        | 61.4       |
| #7 opt $S_1$ 2 fwd | Forward     | CTGTGCTTACCAACGTCTAC        | 57.9       |
| #8 opt $S_2$ fwd   | Forward     | CAGAATGTGCTGTACGAGAAC       | 57.9       |
| #9 3'UTR rev       | Reverse     | GAGGCCGAGTTTGTCTCAGAAAGC    | 62.1       |

Table S3. Nucleotide Sequence for Elements used in HAdV-C5 Expression Cassette for Spike Protein Expression.

| Element             | Sequence                                                                                                                                                                                                                                                                                                                                                                                                                                                                                                                                                                                                                                                                                     |
|---------------------|----------------------------------------------------------------------------------------------------------------------------------------------------------------------------------------------------------------------------------------------------------------------------------------------------------------------------------------------------------------------------------------------------------------------------------------------------------------------------------------------------------------------------------------------------------------------------------------------------------------------------------------------------------------------------------------------|
| CMV Promotor        | TCGTTACATAACTTACGGTAAATGGCCCGCCTGGCTGACCGCCCAACGACCCCCGCCCA<br>TTGACGTCAATAATGACGTATGTTCCCATAGTAACGCCAATAGGGACTTTCCATTGACG<br>TCAATGGGTGGAGTATTTACGGTAAACTGCCCACTTGGCAGTACATCAAGTGTATCATA<br>TGCCAAGTACGCCCCCTATTGACGTCAATGACGGTAAATGGCCCGCCTGGCATTATGCC<br>CAGTACATGACCTTATGGGACTTTTCTACTTGGCAGTACATCTACGTATTAGTCATCGCT<br>ATTACCATGGTGATGCGGTTTTTGGCAGTACATCAATGGGCGTGGATAGCGGTTTGACTC<br>ACGGGGATTTCCAAGTCTCCACCCCATTGACGTCAATGGGAGTTTGTGTTTGGCACCAAA<br>ATCAACGGGACTTTCCAAAATGTCGTAACAACCTCCGCCCCATTGACGCAAATGGGCGG<br>TAGGCGTGACGGTGGGAGGTCTATATAAGCAGAGCTCGTTTAGTGAACCGTCAGA<br>GTAAGTTTAGTCTTTTTGTCTTTTATTTACAGGTCCCGGATCCGGTGGTGGTGCAAATCAA<br>AGAACTGCTCCTCAGTGGATGTTGCCTTTACTTCTAG |
| SV40 Intron         |                                                                                                                                                                                                                                                                                                                                                                                                                                                                                                                                                                                                                                                                                              |
| IL-2 Signal Peptide | TACAGGATGCAACTCCTGTCTTGCAATTGCACTAAGTCTTGCACTTGTCACGAATTCG                                                                                                                                                                                                                                                                                                                                                                                                                                                                                                                                                                                                                                   |
| StrepII Tag         | TGGAGCCACCCCCAGTTCGAGAAG                                                                                                                                                                                                                                                                                                                                                                                                                                                                                                                                                                                                                                                                     |

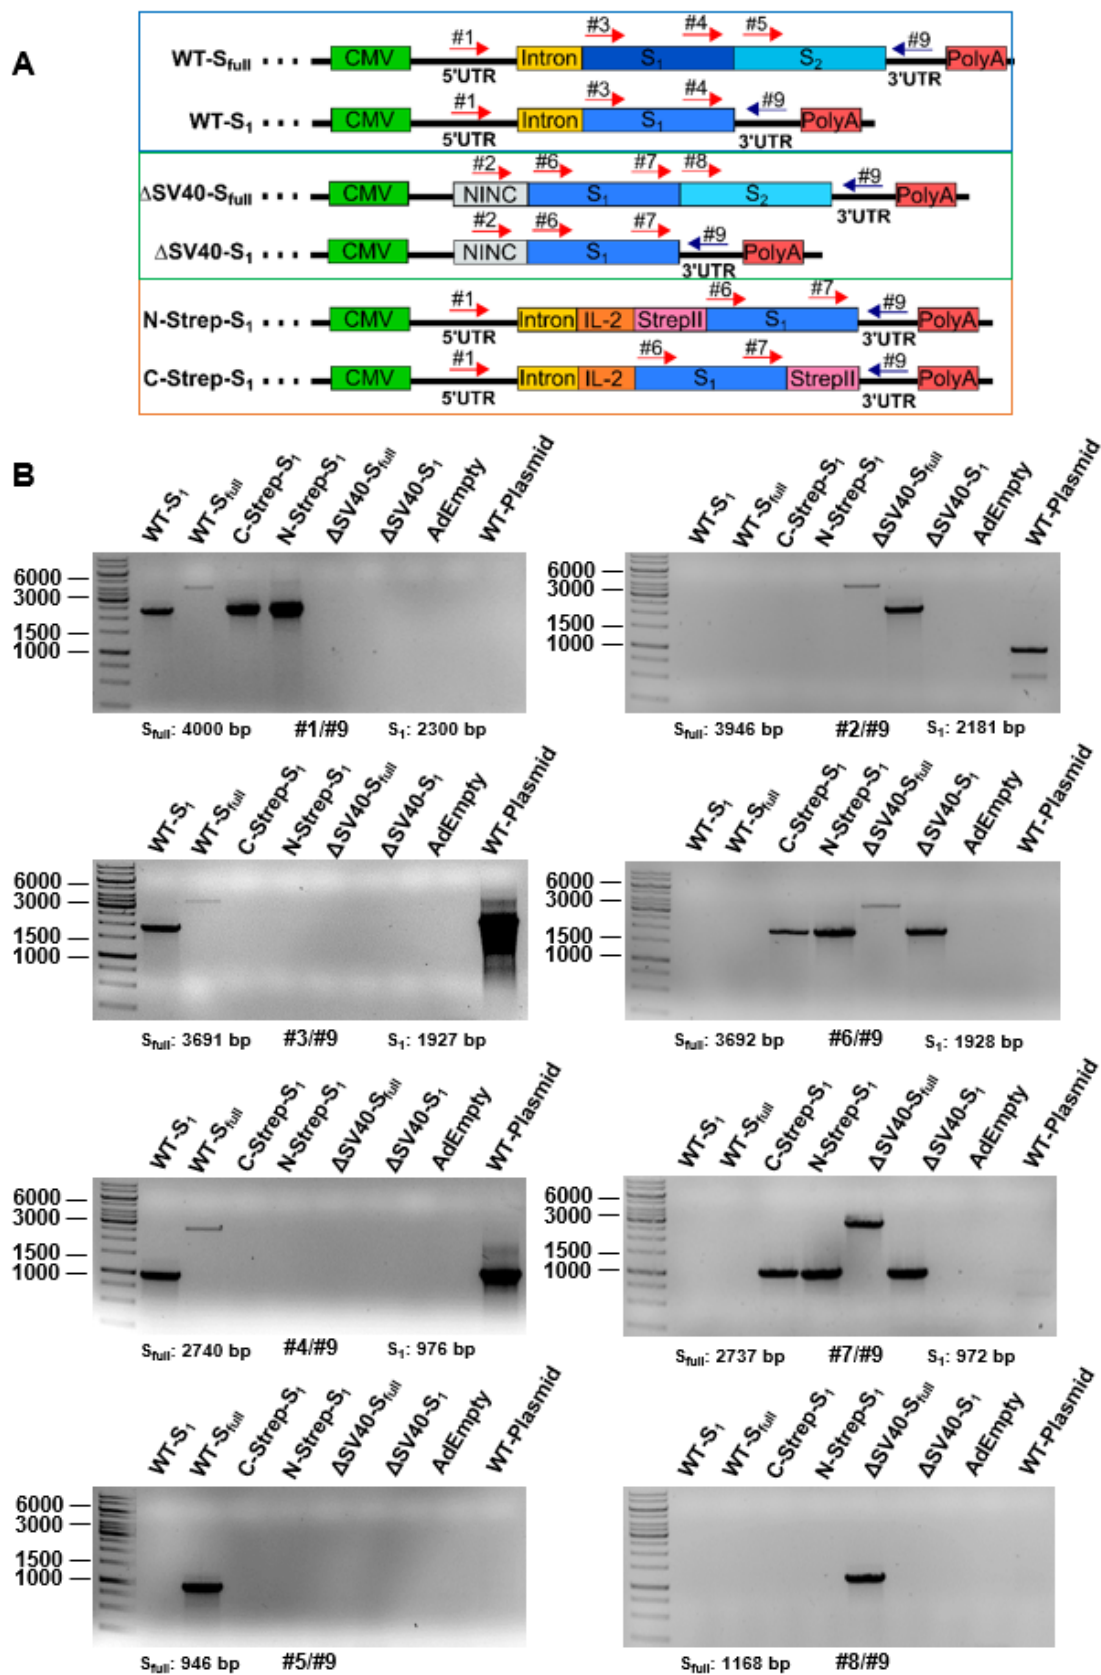

**Figure S1. Analysis of mRNA Splicing by PCR.** (A) Schematic representation of primer placement for amplification of in cDNA transcribed mRNA. (B) A549 cells were infected with a panel of viral vectors for 48 h and total RNA was isolated. RNA was reversely transcribed into cDNA, then PCR was performed with appropriate primers. PCR products were subsequently separated by agarose gel.

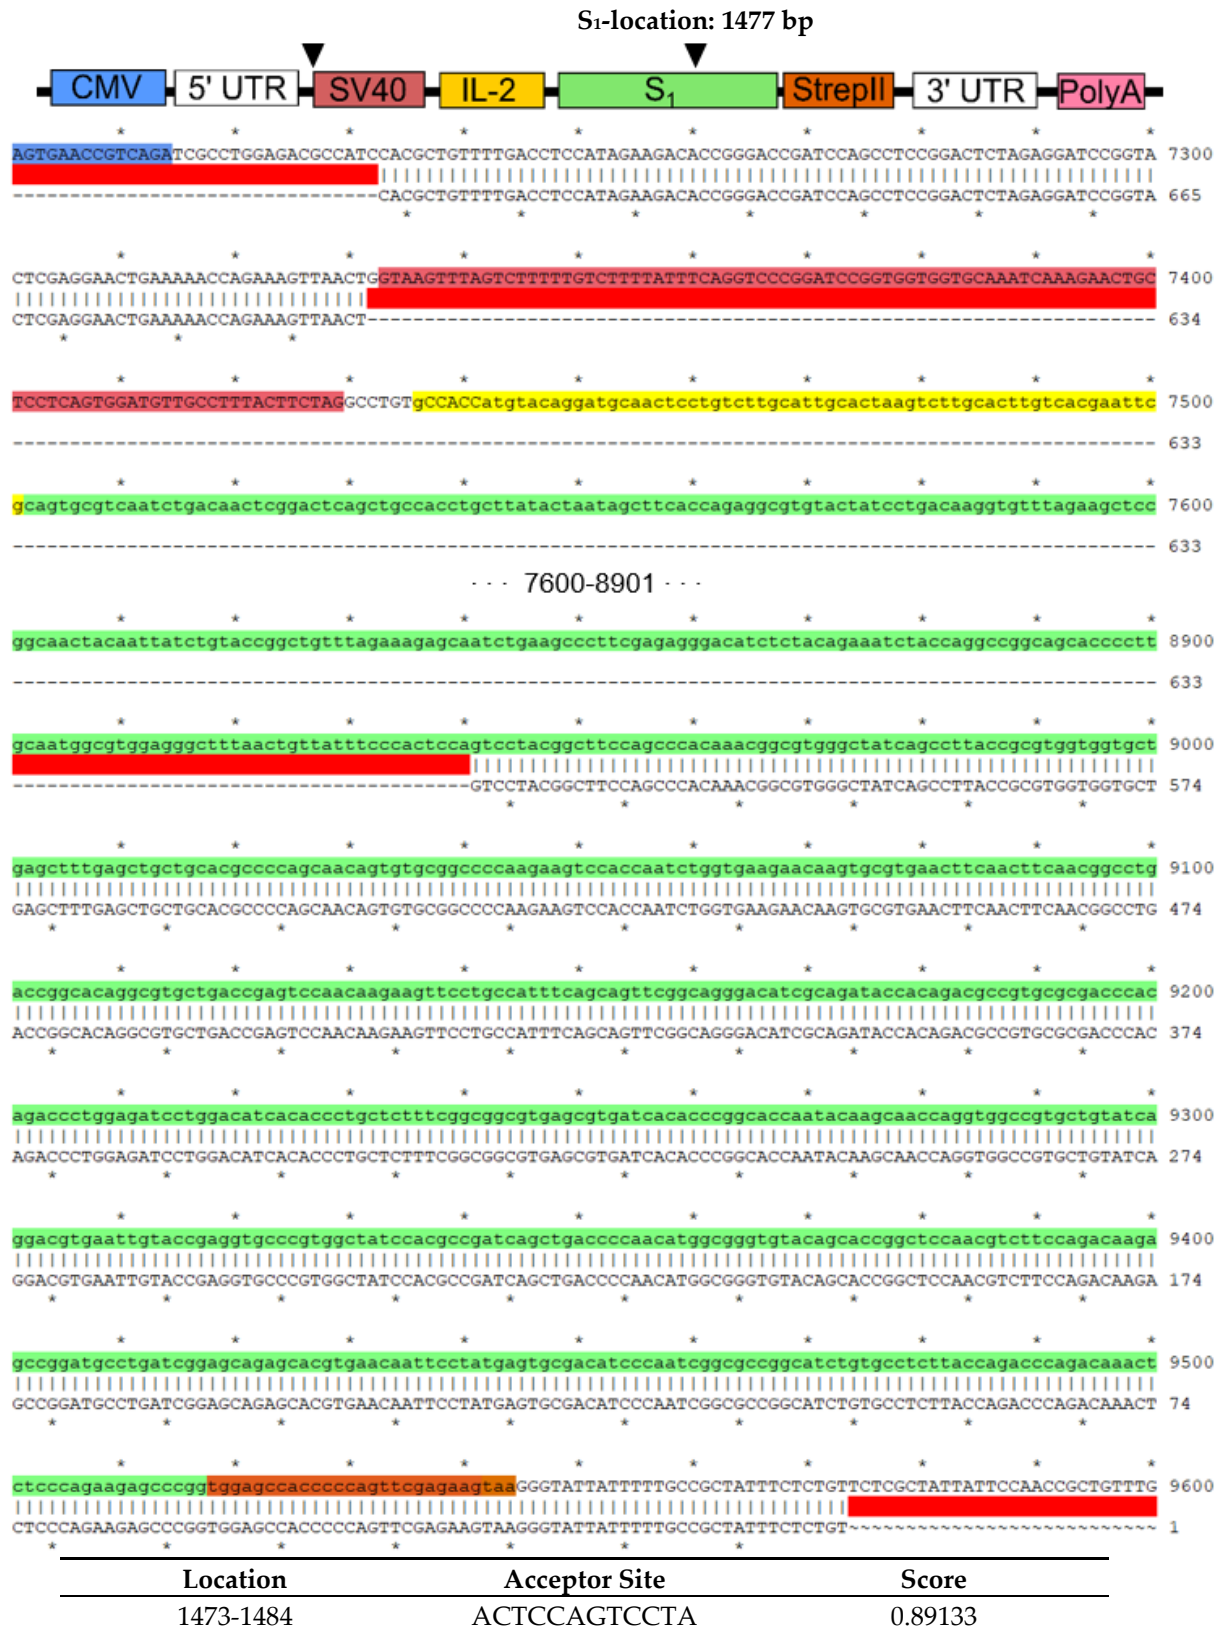

**Figure S2. Results of Splicing Analysis.** Additional band at around 1000 bp from C-Strep-S<sub>1</sub> (Figure 5) was excised from agarose gel, DNA was extracted using phenol-chloroform extraction and subsequently analyzed via Sanger sequencing. Sequence alignment was performed using the plasmid editor ApE (<https://jorgensen.biology.utah.edu/wayned/apE/>). Splice Acceptor site prediction was performed using the SpliceRover Splice Site Predictor tool (<http://bioit2.irc.ugent.be/rover/splicerover>).
